# Supplementary material for: Functional validation of the albinism-associated tyrosinase T373K SNP by CRISPR/Cas9-mediated homology-directed repair (HDR) in rabbits
Source: PubMed Central journal article supplement — eBioMedicine. 2018 Sep 28;36:517–25. doi: 10.1016/j.ebiom.2018.09.041 (PMC6197749; doi:10.1016/j.ebiom.2018.09.041), 2018-09-28
Supplement: mmc1.pdf [file mmc1.pdf]

## Supplementary Material

```

                                sgRNA1      ↓
TAR  TAATGCTTTGCATATGTATATGAATGGAAAGATGTCCCAGGTACAGGGATCTGCCAATGATCCCATTT
OLI  TAATGCTTTGCATATGTATATGAATGGAACGATGTCACAAGTACAGGGATCTGCCAATGATCCCATTT

#B01 TAATGCTTTGCATATGTATATGAATGGAAAGATGTCCCAGGTACAGGGATCTGCCAATGATCCCATTT
---- TAATGCTTTGCATATGTATATGAA-----ATCTGCCAATGATCCCATTT (-24bp)
#B02 TAATGCTTTGCATATGTATATGAATGGAAAGATGTCCCAGGTACAGGGATCTGCCAATGATCCCATTT
---- TAATGCTTTGCATATGTATATGAATGGAAAGA-----TACAGGGATCTGCCAATGATCCCATTT (-9bp)
#B03 TAATGCTTTGCATATGTATATGA-----CCAGGTACAGGGATCTGCCAATGATCCCATTT (-13bp)
---- TAATGCTTTGCATATGTATATGAATGGAAAGAT--CCAGGTACAGGGATCTGCCAATGATCCCATTT (-2bp)
#B04 TAATGCTTTGCATATGTATATGAATGGAAAGATGT----GTACAGGGATCTGCCAATGATCCCATTT (-5bp)
---- TAATGCTTTGCATATGTATATGAATGGAAAGATGT-----AGGGATCTGCCAATGATCCCATTT (-9bp)
#B06 TAATGCTTTGCATATGTATATGAATGGAAAGATGTCCCAGGTACAGGGATCTGCCAATGATCCCATTT
---- TAATGCTTTGCATATGTATATGAATGG-----TACAGGGATCTGCCAATGATCCCATTT (-14bp)
---- TAATGCTTTGCATATGTATATGAATGGAAAGATGT--CAGGTACAGGGATCTGCCAATGATCCCATTT (-2bp)
#B07 TAATGCTTTGCATATGTATATGAATGGAAAGATGTCCCAGGTACAGGGATCTGCCAATGATCCCATTT
---- TAATGCTTTGCATATGTATATGAATGG-----//-----TCTATG (-170bp)
#B09 TAATGCTTTGCATATGTATATGAATG-----AGGGATCTGCCAATGATCCCATTT (-18bp)
---- TAATGCTTTGCATATGTATATGAATGG-----GGATCTGCCAATGATCCCATTT (-19bp)
#B10 TAATGCTTTGCATATGTATATGAATGGAAAGAT-----CAGGGATCTGCCAATGATCCCATTT (-10bp)
#B12 TAATGCTTTGCATATGTATATGAATGGAAAGATGTCCCAGGTACAGGGATCTGCCAATGATCCCATTT
---- TAATGCTTTGCATATGTATATGAATGGAAAGAT--CCAGGTACAGGGATCTGCCAATGATCCCATTT (-2bp)
#B13 TAATGCTTTGCATATGTATATGAATGGAAAGATGTCCCAGGTACAGGGATCTGCCAATGATCCCATTT
---- TAATGCTTTGCATATGTATATGAATG-----AGGGATCTGCCAATGATCCCATTT (-18bp)
#B14 TAATGCTTTGCATATGTATATGAATGGAAAGATGTCCCAGGTACAGGGATCTGCCAATGATCCCATTT
---- TAATGCTTTGCATATGTATATGAATGGAA-----CCAGGTACAGGGATCTGCCAATGATCCCATTT (-6bp)

```

**Figure S1. Editing of the *TYR* gene in blastocysts was verified by T-cloning and Sanger sequencing.** The WT sequence is shown above the target sequence. The sgRNA sequence is marked in green, and the PAM sequences are marked in red and underlined. WT, wild type; deletion, “-”; insertion, “+”.

sgRNA1      ↓

TAR TAATGCTTTGCATATGTATATGAATGGAAAGATGTCCAGGTACAGGGATCTGCCAATGATCCCATTT  
 OLI TAATGCTTTGCATATGTATATGAATGGAAAGATGTCCAGGTACAGGGATCTGCCAATGATCCCATTT

#101 TAATGCTTTGCATATGTATATGAATGGAAAGATGTCCAGGTACAGGGATCTGCCAATGATCCCATTT (WT)  
 #102 TAATGCTTTGCATATGTATATGAATGGAAAGATGTCCAGGTACAGGGATCTGCCAATGATCCCATTT (WT)  
 ---- TAATGCTTTGCATATGTATATGAATGGAAAGATG-----CCAATGATCCCATTT (-19bp)  
 #103 TAATGCTTTGCATATGTATATGAATGGAAAGATGTCCAGGTACAGGGATCTGCCAATGATCCCATTT (WT)  
 ---- TAATGCTTTGCATATGTATATGAATGGAAAGATG-----CCAATGATCCCATTT (-19bp)  
 #105 TAATGCTTTGCATATGTATATGAATGGAAAGATGTCCAGGTACAGGGATCTGCCAATGATCCCATTT (WT)  
 ---- TAATGCTTTGCATATGTATATGAATGGAAAGAT--CCAGGTACAGGGATCTGCCAATGATCCCATTT (-2bp)  
 #107 TAATGCTTTGCATATGTATATGAATGGAAAGAT--CCAGGTACAGGGATCTGCCAATGATCCCATTT (-2bp)

#201 TAATGCTTTGCATATGTATATGAATGGAAAGATG-----ATCCCATTT (-25bp)  
 #202 TAATGCTTTGCATATGTATATGAATGGAAAGATGTCCAGGTACAGGGATCTGCCAATGATCCCATTT (WT)  
 #203 TAATGCTTTGCATATGTATATGAATGGAAAGATGTCCAGGTACAGGGATCTGCCAATGATCCCATTT (WT)  
 ---- TAATGCTTTGCATATGTATATGAATGGAA-----GGATCTGCCAATGATCCCATTT (-18bp)  
 #205 TAATGCTTTGCATATGTATATGAATGGAAAGATGTCCAGGTACAGGGATCTGCCAATGATCCCATTT (WT)  
 ---- TAATGCTTTGCATATGTATATGAATGGAAAGATG-----ATCCCATTT (-25bp)

#301 TAATGCTTTGCATATGTATATGAATGGAAAGATGTCCAGGTACAGGGATCTGCCAATGATCCCATTT (WT)  
 ---- TAATGCTTTGCATATGTATATGAATGGAAAGA-----TACAGGGATCTGCCAATGATCCCATTT (-9bp)  
 #302 TAATGCTTTGCATATGTATATGAATGGAAAGATGTCCAGGTACAGGGATCTGCCAATGATCCCATTT (WT)  
 ---- TAATGCTTTGCATATGTATATGAATGGAA-----AGGTACAGGGATCTGCCAATGATCCCATTT (-9bp)  
 ---- TAATGCTTTGCATATGTATATGAATGGAAAGATGTCC-AGGTACAGGGATCTGCCAATGATCCCATTT (-1bp)  
 #303 TAATGCTTTGCATATGTATATGAATGGAAAGATGTCC-AGGTACAGGGATCTGCCAATGATCCCATTT (-1bp)  
 #304 TAATGCTTTGCATATGTATATGAATGGAAAGATGTCCAGGTACAGGGATCTGCCAATGATCCCATTT (WT)  
 ---- TAATGCTTTGCATATGTATATGAATGGAAAGAT--CCAGGTACAGGGATCTGCCAATGATCCCATTT (-2bp)  
 ---- TAATGCTTTGCATATGTATATGAATGG-----//-----TCTATG (-170bp)  
 #305 TAATGCTTTGCATATGTATATGAATGGAAAGATGTCC---GTACAGGGATCTGCCAATGATCCCATTT (-4bp)  
 #306 TAATGCTTTGCATATGTATATGAATGG-----TACAGGGATCTGCCAATGATCCCATTT (-14bp)

#401 TAATGCTTTGCATATGTATATGAATGGAAAGATGTCCAGGTACAGGGATCTGCCAATGATCCCATTT (WT)  
 ---- TAATGCTTTGCATATGTATATGAATGG-----TACAGGGATCTGCCAATGATCCCATTT (-14bp)  
 #402 TAATGCTTTGCATATGTATATGAATGGAAAGATGTCCAGGTACAGGGATCTGCCAATGATCCCATTT (WT)  
 ---- TAATGCTTTGCATATGTATATGAATGGAAAGATGT--CAGGTACAGGGATCTGCCAATGATCCCATTT (-2bp)  
 ---- CACAAAGATTAGTTCAATACTCTC-----//-----TCTCCTTACCATGCG (-278bp)

**Figure S2. Editing of the *TYR* gene in rabbits was verified by T-cloning and Sanger sequencing.** The WT sequence is shown above the target sequence. The sgRNA sequence is marked in green, and the PAM sequences are marked in red and underlined. WT, wild type; deletion, “-”; insertion, “+”.

WT

|   | T    | A  | T    | G    | A    | A    | T    | G    | G    | A    | A    | A   | G   | A    | T    | G    | T    | C    | C   | C    | A   | G    | G    |
|---|------|----|------|------|------|------|------|------|------|------|------|-----|-----|------|------|------|------|------|-----|------|-----|------|------|
| T | 93.6 | 5  | 94.5 | 0.9  | 0.9  | 3.4  | 90.4 | 0.6  | 1.2  | 0.6  | 1.2  | 0.1 | 2.6 | 3.7  | 92.6 | 4.1  | 93.6 | 2.3  | 0.9 | 2.3  | 0.6 | 2.4  | 1.1  |
| G | 1.3  | 0  | 2.9  | 90.8 | 1.3  | 2.2  | 6.4  | 97.3 | 92.9 | 1    | 0.9  | 3.9 | 87  | 0.3  | 4.7  | 94.1 | 0.5  | 0.4  | 1.3 | 0.4  | 0.4 | 96.9 | 98.3 |
| C | 0.7  | 0  | 1.4  | 0.5  | 0.3  | 1.2  | 2    | 0.2  | 0    | 0.2  | 1.6  | 0   | 0.4 | 0.2  | 1.1  | 0    | 5.3  | 96.4 | 97  | 96.4 | 2   | 0.7  | 0.2  |
| A | 4.3  | 95 | 1.1  | 7.8  | 97.4 | 93.3 | 1.2  | 1.9  | 5.9  | 98.2 | 96.2 | 96  | 10  | 95.8 | 1.6  | 1.8  | 0.5  | 0.9  | 0.9 | 0.9  | 97  | 0.6  | 0.4  |

K373T-Hom

|   | T    | A    | T    | G    | A    | A    | T    | G    | G    | A    | A    | C    | G    | A    | T   | G    | T    | C    | C    | C    | A    | G    | G    |
|---|------|------|------|------|------|------|------|------|------|------|------|------|------|------|-----|------|------|------|------|------|------|------|------|
| T | 97.3 | 2.3  | 96.1 | 2    | 1.6  | 2.3  | 93.1 | 0.9  | 0    | 0.6  | 1.2  | 1.6  | 1.7  | 1.7  | 93  | 0.7  | 91.2 | 1.9  | 2.9  | 3    | 0.8  | 0.4  | 1    |
| G | 0.6  | 3.5  | 1.4  | 93.9 | 4.8  | 6    | 3.3  | 95.7 | 94.6 | 4.1  | 2.9  | 2.6  | 94.7 | 3.3  | 2.1 | 94.7 | 2.7  | 1.4  | 0    | 1.8  | 4.5  | 3.2  | 93.3 |
| C | 0.5  | 0.6  | 0    | 1.2  | 0.1  | 0.1  | 0    | 1.3  | 1.5  | 0    | 0.1  | 95.8 | 0.6  | 0.1  | 2.4 | 2.8  | 4.5  | 96.3 | 0.5  | 93.9 | 1.7  | 3    | 2.2  |
| A | 1.7  | 93.6 | 2.5  | 3    | 93.5 | 91.6 | 3.6  | 2.2  | 3.9  | 95.3 | 95.8 | 0    | 3    | 94.9 | 2.5 | 1.8  | 1.5  | 0.5  | 96.6 | 1.3  | 94.4 | 93.4 | 3    |

K373T-Het

|   | T    | A    | T    | G    | A    | A    | T    | G    | G    | A    | A    | A    | G    | A    | T    | G    | T    | C    | C    | C    | A    | A    | G    |
|---|------|------|------|------|------|------|------|------|------|------|------|------|------|------|------|------|------|------|------|------|------|------|------|
| T | 90.8 | 6.2  | 90.1 | 1.6  | 1.7  | 6.3  | 85.5 | 0.8  | 0.5  | 2    | 2.3  | 1.6  | 1.2  | 5.3  | 87.6 | 3.4  | 89.1 | 1.4  | 1.6  | 0    | 2.3  | 2.4  | 4    |
| G | 1    | 2.2  | 5    | 87.8 | 1.7  | 3.4  | 10.4 | 97.7 | 91.7 | 2.1  | 2.1  | 5.4  | 88.3 | 2.1  | 6.6  | 93.4 | 2.4  | 0.8  | 1.5  | 1.9  | 4.5  | 46   | 93.3 |
| C | 1.9  | 0.1  | 2.3  | 0    | 0    | 0    | 2.2  | 0    | 0.5  | 0.2  | 1.9  | 41.8 | 0.9  | 0.3  | 2.3  | 1    | 7    | 94.8 | 60.9 | 92.5 | 1.7  | 0.7  | 0.2  |
| A | 6.2  | 91.5 | 2.6  | 10.6 | 96.7 | 90.2 | 1.9  | 1.5  | 7.3  | 95.7 | 93.8 | 51.2 | 9.6  | 92.3 | 3.3  | 2.2  | 1.6  | 3    | 36   | 5.6  | 91.5 | 50.9 | 2.4  |

K373T-Chi

|   | T    | A    | T    | G    | A    | A   | T    | G    | G    | A    | A    | C    | G    | A    | T    | G    | T    | C    | A    | C    | A    | A    | G    |
|---|------|------|------|------|------|-----|------|------|------|------|------|------|------|------|------|------|------|------|------|------|------|------|------|
| T | 94.2 | 8    | 90.2 | 2    | 2.1  | 6.8 | 87.3 | 1    | 0    | 1.8  | 1.9  | 0.5  | 1.3  | 4.3  | 71.2 | 19.2 | 92.4 | 20   | 23   | 1.8  | 1.9  | 2.7  | 22.4 |
| G | 0.5  | 1.6  | 8.2  | 88.7 | 2.3  | 0   | 10.4 | 97.5 | 91.5 | 1.8  | 1.6  | 7.5  | 89.4 | 19.9 | 5.2  | 78.3 | 2.5  | 0    | 2.2  | 1.8  | 19.3 | 13   | 75.8 |
| C | 0    | 1.6  | 0    | 1.5  | 0    | 0.2 | 0.5  | 0.9  | 0.9  | 0    | 4    | 72.1 | 1.5  | 0    | 1    | 2.2  | 4.9  | 78.1 | 9.5  | 76.8 | 1.9  | 0    | 0.3  |
| A | 5.4  | 88.8 | 1.6  | 7.8  | 95.6 | 93  | 1.7  | 0.6  | 0.6  | 96.4 | 92.5 | 19.9 | 7.7  | 75.8 | 22.5 | 0.3  | 0.2  | 1.9  | 65.3 | 19.6 | 77   | 84.3 | 1.5  |

**Figure S3. GUIDE-seq results at sgRNA-targeted genomic sites in TYR-K373T mutant rabbits.** The number represents the percentage of bases in this position. The blue is represented by unaltered base, and yellow represents directed mutation base. K373T-Hom, homozygous mutation of K373T; K373T-Chi, chimaeric mutation of K373T; K373T-Het, heterozygous mutation of K373T; WT, New Zealand white rabbit with a natural T373K mutation.

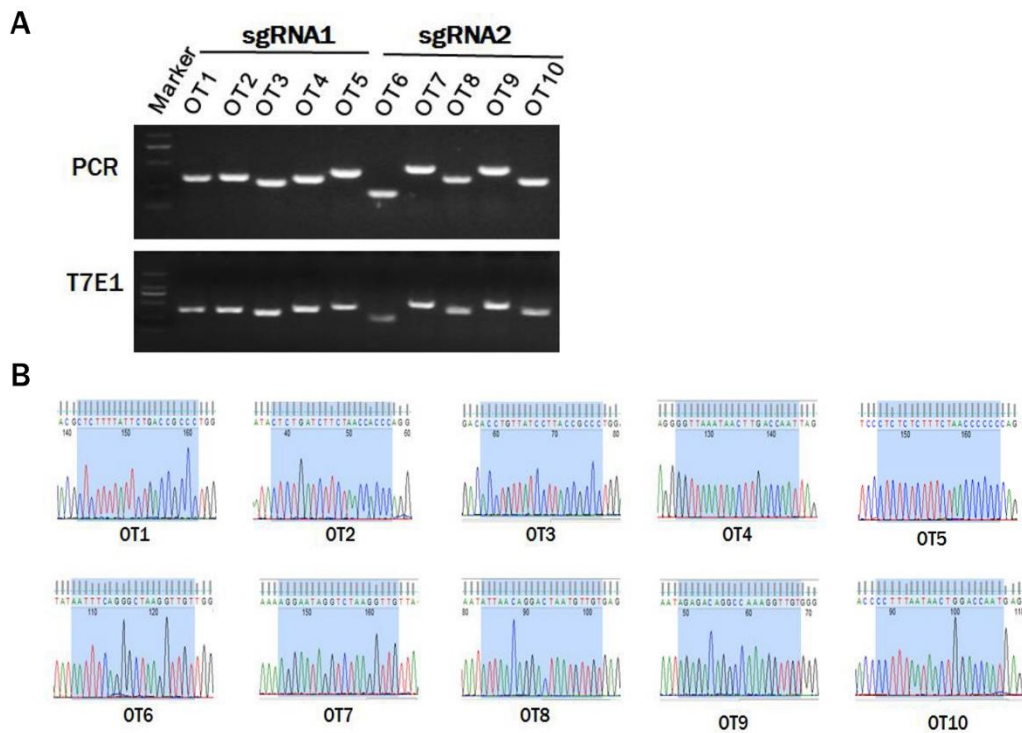

**Figure S4. Identification of off-target effects in TYR K373T mutant rabbits.**

(A) PCR and T7E1 cleavage analysis of POTS for sgRNA. M, DL2000; OT1–10, ten POTS. No fragment was detected in T7E1 assays. (B) Chromatogram sequence analysis of 10 POTS for sgRNA in TYR-K373T mutant rabbits; double peaks were not observed in any of the sequencing chromatograms. The blue area represents the POTS sequence.

**Table S1: Oligonucleotide used for sgRNA, PCR and qRT-PCR .**

| <b>Name</b>     | <b>Primers</b> | <b>Sequence(5'-3')</b>       | <b>Produce size (bp)</b> |
|-----------------|----------------|------------------------------|--------------------------|
| <b>SgRNA</b>    | SgRNA -1-F     | TAGG TATGAATGGAAAGATGTCCC    | 24                       |
|                 | SgRNA -1-R     | AAAC GGGACATCTTTCCATTCATA    |                          |
| <b>TYR-cell</b> | TYR-cell-F     | GGCTAGCCATGCGTCTGACTGTTTTATA |                          |
|                 | TYR-cell-R     | GGAATTCCTTATAGATGGCTCTGATACA |                          |
| <b>TYR</b>      | TYR-F          | CAGGAGAGAGAGCAAATTGGC        | 695                      |
|                 | TYR-R          | AGATCTGGCTGAGTCTGAGAC        |                          |
| <b>TYR-Q</b>    | TYR-Q-F        | GGATAGCAGATGCCACTCAA         | 100                      |
|                 | TYR-Q-R        | AACGCATGGTGAAGGAGAAA         |                          |
| <b>GAPDH</b>    | GAPDH-F        | TTCCACGGCAGGTCAAGGC          | 99                       |
|                 | GAPDH-R        | GGGCACCAGCATCACCCAC          |                          |

\* TYR-cell were used for the cell experiment SgRNA were used for the construction of sgRNA expression plasmids; TYR was used for the PCR mutation detection; TYR-Q was used to test the mRNA expression of founder rabbit.

**Table S2.10 Potential off-target sites examined by PCR and the primers used.**

|    | <b>Potential off-target site</b> | <b>Number of mismatches</b> | <b>Position</b>      | <b>PCR primer</b>                                         |
|----|----------------------------------|-----------------------------|----------------------|-----------------------------------------------------------|
| 1  | GATTAATGTTACGATGTCCCCGG          | 2                           | chr7:<br>-148540069  | F: CTAGTCTGGGATCAGACAGGTA<br>R: TCTCATGTCACCTTCACTTTCC    |
| 2  | TGTTTCATGGACCGATGTCCCTGG         | 2                           | chrUN0:<br>-1215984  | F: ACTGGGTGTGATTGTGAAGTAA<br>R: CGGAGTGTCTTTGTAGCATCA     |
| 3  | TGTTAATTGAACGATGGCCCTGG          | 3                           | chr18:<br>-17497659  | F: AATATTCCAGGTGGCTTCCC<br>R: CATGGCAATTTGTGTTGCATT       |
| 4  | TATGAAAGGGACGATGTCTCAGG          | 3                           | chr2:<br>+134076656  | F: GCTACTCTTAGGATCATTGGTTACT<br>R: ATTTGGGATGCTGTGCATAAAG |
| 5  | TATCCATGGAACGCTGTCCCAGG          | 3                           | chr3:<br>-143791182  | F: CCTCTTTCTGCCTTCCGATTT<br>R: AGATAGACCCTCTCCCTTGTTT     |
| 6  | TATCAATCCAACCATGTCCCAGG          | 2                           | chr3:<br>+57083673   | F: GCCGTCATAAAGGCTCATCT<br>R: ATGCCAGATCCTCTGCTTTC        |
| 7  | TATAAGAGGAAGGATGTCCCTGG          | 2                           | chr3:<br>-31667645   | F: GCAGAGGATCAGAGCAAAGAA<br>R: GGTGAGACGCACTTCCATAAA      |
| 8  | GATGAATGGAGGGATGTCGCTGG          | 3                           | chr17:<br>+28450946  | F: GGTGCCACACATTCAATTAG<br>R: TGGCAGAACTGTACAACAAAG       |
| 9  | TATGAATGTAAAGATGTCTCTGG          | 4                           | chr12:<br>-63613896  | F: GGGCAGTGAAGGGCATTTA<br>R: CAGTGGATGACGCAGAAAGA         |
| 10 | TATTAATGCAGCGATGTCCAAGG          | 4                           | chr12:<br>+140753137 | F: GCATGGATCTGAAGCAAACATC<br>R: CTTCTCACGTACACCGTCTTTAT   |
